# Supplementary material for: G9a Knockdown Suppresses Cancer Aggressiveness by Facilitating Smad Protein Phosphorylation through Increasing BMP5 Expression in Luminal A Type Breast Cancer
Source: MDPI journal article supplement (doi:10.3390/ijms23020589), 2022-01-06
Supplement: s1 [file s1]

**Table S1.** The patients with stage 3 disease showed higher BMP5 levels than those of Stage 2.

| No. | Age | Pathology diagnosis (BR1507) | TNM    | Grade | Stage | BMP5 |
|-----|-----|------------------------------|--------|-------|-------|------|
| A1  | 50  | Invasive ductal carcinoma    | T2N0M0 | 1     | IIA   | 2    |
| A2  |     |                              |        |       |       | 2    |
| A3  |     |                              |        |       |       | 2    |
| A4  | 45  | Invasive ductal carcinoma    | T3N0N0 | 2     | IIB   | 2    |
| A5  |     |                              |        |       |       | 2    |
| A6  |     |                              |        |       |       | 2    |
| A7  | 54  | Invasive ductal carcinoma    | T2N0M0 | 3     | IIA   | 3    |
| A8  |     |                              |        |       |       | 2    |
| A9  |     |                              |        |       |       | 3    |
| A10 | 50  | Invasive ductal carcinoma    | T3N0M0 | 1     | IIB   | 2    |
| A11 |     |                              |        |       |       | 2    |
| A12 |     |                              |        |       |       | 1    |
| A13 | 71  | Invasive ductal carcinoma    | T4N2M0 | 2     | IIIB  | 2    |
| A14 |     |                              |        |       |       | 1    |
| A15 |     |                              |        |       |       | 3    |
| B1  | 52  | Invasive ductal carcinoma    | T3N1M0 | 2     | IIIA  | 0    |
| B2  |     |                              |        |       |       | 0    |
| B3  |     |                              |        |       |       | 1    |
| B4  | 70  | Invasive ductal carcinoma    | T4N2M0 | 1     | IIIB  | 2    |
| B5  |     |                              |        |       |       | 1    |
| B6  |     |                              |        |       |       | 1    |
| B7  | 55  | Invasive ductal carcinoma    | T2N1M0 | 2     | IIB   | 2    |
| B8  |     |                              |        |       |       | 1    |
| B9  |     |                              |        |       |       | 1    |
| B10 | 48  | Invasive ductal carcinoma    | T2N1M0 | 1     | IIB   | 2    |
| B11 |     |                              |        |       |       | 2    |
| B12 |     |                              |        |       |       | 2    |
| B13 | 43  | Invasive ductal carcinoma    | T2N1M0 | 1     | IIB   | 3    |
| B14 |     |                              |        |       |       | 3    |
| B15 |     |                              |        |       |       | 3    |
| C1  | 52  | Invasive ductal carcinoma    | T2N0M0 | 2     | IIA   | 1    |
| C2  |     |                              |        |       |       | 1    |
| C3  |     |                              |        |       |       | 1    |
| C4  | 23  | Invasive ductal carcinoma    | T3N1M0 | 2     | IIIA  | 1    |
| C5  |     |                              |        |       |       | 2    |
| C6  |     |                              |        |       |       | 2    |
| C7  | 61  | Invasive ductal carcinoma    | T2N1M0 | 2     | IIB   | 1    |
| C8  |     |                              |        |       |       | 2    |
| C9  |     |                              |        |       |       | 1    |
| C10 | 51  | Invasive ductal carcinoma    | T3N2M0 | 2     | IIIA  | 2    |
| C11 |     |                              |        |       |       | 2    |
| C12 |     |                              |        |       |       | 3    |
| C13 | 68  | Invasive ductal carcinoma    | T3N0M0 | 2     | IIB   | 3    |
| C14 |     |                              |        |       |       | 3    |
| C15 |     |                              |        |       |       | 3    |
| D1  | 51  | Invasive ductal carcinoma    | T2N0M0 | 2     | IIA   | 2    |
| D2  |     |                              |        |       |       | 1    |
| D3  |     |                              |        |       |       | 2    |
| D4  | 52  | Invasive ductal carcinoma    | T2N0M0 | 3     | IIA   | 3    |
| D5  |     |                              |        |       |       | n.d. |
| D6  |     |                              |        |       |       | 3    |
| D7  | 74  | Invasive ductal carcinoma    |        |       |       | 2    |

|     |    |                           |        |   |      |   |
|-----|----|---------------------------|--------|---|------|---|
| D8  |    |                           | T2N1M0 | 1 | IIB  | 2 |
| D9  |    |                           |        |   |      | 2 |
| D10 |    |                           |        |   |      | 2 |
| D11 | 56 | Invasive ductal carcinoma | T2N0M0 | 2 | IIA  | 2 |
| D12 |    |                           |        |   |      | 2 |
| D13 |    |                           |        |   |      | 2 |
| D14 | 49 | Invasive ductal carcinoma | T2N0M0 | 1 | IIA  | 2 |
| D15 |    |                           |        |   |      | 2 |
| E1  |    |                           |        |   |      | 1 |
| E2  | 53 | Invasive ductal carcinoma | T4N0M0 | 2 | IIIB | 1 |
| E3  |    |                           |        |   |      | 0 |
| E4  |    |                           |        |   |      | 1 |
| E5  | 37 | Invasive ductal carcinoma | T4N0M0 | 1 | IIIB | 1 |
| E6  |    |                           |        |   |      | 2 |
| E7  |    |                           |        |   |      | 1 |
| E8  | 57 | Invasive ductal carcinoma | T2N0M0 | 2 | IIA  | 2 |
| E9  |    |                           |        |   |      | 3 |
| E10 |    |                           |        |   |      | 2 |
| E11 | 48 | Invasive ductal carcinoma | T2N1M0 | 2 | IIB  | 3 |
| E12 |    |                           |        |   |      | 2 |
| E13 |    |                           |        |   |      | 1 |
| E14 | 58 | Invasive ductal carcinoma | T3N1M0 | 2 | IIIA | 1 |
| E15 |    |                           |        |   |      | 1 |
| F1  |    |                           |        |   |      | 1 |
| F2  | 43 | Invasive ductal carcinoma | T2N0M0 | 1 | IIA  | 2 |
| F3  |    |                           |        |   |      | 3 |
| F4  |    |                           |        |   |      | 2 |
| F5  | 62 | Invasive ductal carcinoma | T2N0M0 | 2 | IIA  | 2 |
| F6  |    |                           |        |   |      | 1 |
| F7  |    |                           |        |   |      | 3 |
| F8  | 61 | Invasive ductal carcinoma | T2N0M0 | 2 | IIIB | 3 |
| F9  |    |                           |        |   |      | 3 |
| F10 |    |                           |        |   |      | 3 |
| F11 | 55 | Invasive ductal carcinoma | T2N0M0 | 1 | IIA  | 2 |
| F12 |    |                           |        |   |      | 2 |
| F13 |    |                           |        |   |      | 1 |
| F14 | 63 | Invasive ductal carcinoma | T4N0M0 | 2 | IIIB | 1 |
| F15 |    |                           |        |   |      | 1 |
| G1  |    |                           |        |   |      | 1 |
| G2  | 42 | Invasive ductal carcinoma | T2N1M0 | 2 | IIB  | 1 |
| G3  |    |                           |        |   |      | 2 |
| G4  |    |                           |        |   |      | 0 |
| G5  | 55 | Invasive ductal carcinoma | T2N2M0 | 2 | IIIA | 0 |
| G6  |    |                           |        |   |      | 1 |
| G7  |    |                           |        |   |      | 2 |
| G8  | 81 | Invasive ductal carcinoma | T2N2M0 | 2 | IIIA | 2 |
| G9  |    |                           |        |   |      | 2 |
| G10 |    |                           |        |   |      | 3 |
| G11 | 78 | Invasive ductal carcinoma | T4N0M0 | 2 | IIIB | 3 |
| G12 |    |                           |        |   |      | 3 |
| G13 |    |                           |        |   |      | 2 |
| G14 | 37 | Invasive ductal carcinoma | T2N2M0 | 2 | IIIA | 3 |
| G15 |    |                           |        |   |      | 2 |
| H1  | 34 | Invasive ductal carcinoma |        |   |      | 0 |

|     |    |                              |        |   |      |   |
|-----|----|------------------------------|--------|---|------|---|
| H2  |    |                              | T4N0M0 | 2 | IIIB | 0 |
| H3  |    |                              |        |   |      | 1 |
| H4  |    |                              |        |   |      | 0 |
| H5  | 69 | Invasive ductal carcinoma    | T3N0M0 | 2 | IIB  | 0 |
| H6  |    |                              |        |   |      | 0 |
| H7  |    |                              |        |   |      | 2 |
| H8  | 41 | Invasive ductal carcinoma    | T2N0M0 | 1 | IIA  | 2 |
| H9  |    |                              |        |   |      | 2 |
| H10 |    |                              |        |   |      | 2 |
| H11 | 47 | Invasive ductal carcinoma    | T4N1M0 | 2 | IIIB | 2 |
| H12 |    |                              |        |   |      | 2 |
| H13 |    |                              |        |   |      | 0 |
| H14 | 56 | Invasive ductal carcinoma    | T2N0M0 | 2 | IIA  | 1 |
| H15 |    |                              |        |   |      | 2 |
| I1  | 50 | Invasive ductal carcinoma    | T2N1M0 | 2 | IIB  | 1 |
| I2  |    |                              |        |   |      | 1 |
| I3  |    |                              |        |   |      | 1 |
| I4  | 40 | Invasive ductal carcinoma    | T2N0M0 | 2 | IIA  | 1 |
| I5  |    |                              |        |   |      | 2 |
| I6  |    |                              |        |   |      | 1 |
| I7  | 38 | Invasive lobular carcinoma   | T2N0M0 | - | IIA  | 1 |
| I8  |    |                              |        |   |      | 2 |
| I9  |    |                              |        |   |      | 2 |
| I10 | 49 | Invasive lobular carcinoma   | T2N0M0 | - | IIA  | 3 |
| I11 |    |                              |        |   |      | 2 |
| I12 |    |                              |        |   |      | 3 |
| I13 | 49 | Invasive ductal carcinoma    | T2N0M0 | 2 | IIA  | 3 |
| I14 |    |                              |        |   |      | 3 |
| I15 |    |                              |        |   |      | 2 |
| J1  | 43 | Invasive papillary carcinoma | T2N1M0 | - | IIB  | 1 |
| J2  |    |                              |        |   |      | 1 |
| J3  |    |                              |        |   |      | 1 |
| J4  | 40 | Invasive ductal carcinoma    | T3N0M0 | 2 | IIB  | 0 |
| J5  |    |                              |        |   |      | 0 |
| J6  |    |                              |        |   |      | 0 |
| J7  | 45 | Invasive ductal carcinoma    | T2N1M0 | 2 | IIB  | 1 |
| J8  |    |                              |        |   |      | 1 |
| J9  |    |                              |        |   |      | 2 |
| J10 | 35 | Invasive ductal carcinoma    | T3N0M0 | 2 | IIB  | 1 |
| J11 |    |                              |        |   |      | 1 |
| J12 |    |                              |        |   |      | 1 |
| J13 | 50 | Invasive ductal carcinoma    | T4N2M0 | 2 | IIIB | 2 |
| J14 |    |                              |        |   |      | 2 |
| J15 |    |                              |        |   |      | 2 |

| No. | Age | Pathology diagnosis (BR1508) | TNM    | Grade | Stage | BMP5 |
|-----|-----|------------------------------|--------|-------|-------|------|
| A1  | 42  | Invasive ductal carcinoma    | T3N0N0 | 2     | IIB   | 3    |
| A2  |     |                              |        |       |       | 3    |
| A3  |     |                              |        |       |       | 2    |
| A4  | 70  | Invasive ductal carcinoma    | T3N0N0 | 2     | IIB   | 1    |
| A5  |     |                              |        |       |       | 1    |
| A6  |     |                              |        |       |       | 2    |
| A7  | 48  | Invasive ductal carcinoma    | T2N0M0 | 3     | IIA   | 3    |
| A8  |     |                              |        |       |       | 3    |

|     |    |                           |        |   |      |   |
|-----|----|---------------------------|--------|---|------|---|
| A9  |    |                           |        |   |      | 3 |
| A10 | 46 | Invasive ductal carcinoma | T3N0M0 | 2 | IIB  | 1 |
| A11 |    |                           |        |   |      | 2 |
| A12 |    |                           |        |   |      | 2 |
| A13 |    |                           |        |   |      | 3 |
| A14 | 46 | Invasive ductal carcinoma | T2N0M0 | 2 | IIA  | 2 |
| A15 |    |                           |        |   |      | 3 |
| B1  |    |                           |        |   |      | 3 |
| B2  | 54 | Invasive ductal carcinoma | T3N0N0 | 2 | IIB  | 3 |
| B3  |    |                           |        |   |      | 3 |
| B4  |    |                           |        |   |      | 2 |
| B5  | 36 | Invasive ductal carcinoma | T3N0N0 | 1 | IIB  | 2 |
| B6  |    |                           |        |   |      | 2 |
| B7  |    |                           |        |   |      | 2 |
| B8  | 52 | Invasive ductal carcinoma | T3N0N0 | 2 | IIB  | 3 |
| B9  |    |                           |        |   |      | 3 |
| B10 |    |                           |        |   |      | 2 |
| B11 | 31 | Invasive ductal carcinoma | T4N2M0 | 1 | IIIB | 2 |
| B12 |    |                           |        |   |      | 3 |
| B13 |    |                           |        |   |      | 3 |
| B14 | 48 | Invasive ductal carcinoma | T2N0M0 | 1 | IIA  | 3 |
| B15 |    |                           |        |   |      | 3 |
| C1  |    |                           |        |   |      | 2 |
| C2  | 48 | Invasive ductal carcinoma | T4N1M0 | 2 | IIIB | 2 |
| C3  |    |                           |        |   |      | 2 |
| C4  |    |                           |        |   |      | 3 |
| C5  | 37 | Invasive ductal carcinoma | T2N0M0 | 3 | IIA  | 3 |
| C6  |    |                           |        |   |      | 2 |
| C7  |    |                           |        |   |      | 2 |
| C8  | 60 | Invasive ductal carcinoma | T3N0M0 | 2 | IIB  | 3 |
| C9  |    |                           |        |   |      | 2 |
| C10 |    |                           |        |   |      | 2 |
| C11 | 75 | Invasive ductal carcinoma | T2N1M0 | 2 | IIB  | 2 |
| C12 |    |                           |        |   |      | 3 |
| C13 |    |                           |        |   |      | 3 |
| C14 | 58 | Invasive ductal carcinoma | T3N2M0 | 2 | IIIA | 3 |
| C15 |    |                           |        |   |      | 3 |
| D1  |    |                           |        |   |      | 3 |
| D2  | 50 | Invasive ductal carcinoma | T4N1M0 | 3 | IIIB | 2 |
| D3  |    |                           |        |   |      | 2 |
| D4  |    |                           |        |   |      | 1 |
| D5  | 28 | Invasive ductal carcinoma | T2N1M0 | 2 | IIB  | 2 |
| D6  |    |                           |        |   |      | 1 |
| D7  |    |                           |        |   |      | 1 |
| D8  | 40 | Invasive ductal carcinoma | T2N0M0 | 2 | IIA  | 1 |
| D9  |    |                           |        |   |      | 2 |
| D10 |    |                           |        |   |      | 3 |
| D11 | 36 | Invasive ductal carcinoma | T2N0M0 | 3 | IIA  | 3 |
| D12 |    |                           |        |   |      | 3 |
| D13 |    |                           |        |   |      | 3 |
| D14 | 46 | Invasive ductal carcinoma | T3N0M0 | 2 | IIB  | 3 |
| D15 |    |                           |        |   |      | 3 |
| E1  |    |                           |        |   |      | 1 |
| E2  | 42 | Invasive ductal carcinoma | T4N0M0 | 2 | IIIB | 1 |

|     |    |                           |        |     |      |   |
|-----|----|---------------------------|--------|-----|------|---|
| E3  |    |                           |        |     |      | 1 |
| E4  | 42 | Invasive ductal carcinoma | T2N1M0 | 1-2 | IIB  | 1 |
| E5  |    |                           |        |     |      | 2 |
| E6  |    |                           |        |     |      | 2 |
| E7  |    |                           |        |     |      | 3 |
| E8  | 36 | Invasive ductal carcinoma | T3N0M0 | 1   | IIB  | 3 |
| E9  |    |                           |        |     |      | 3 |
| E10 |    |                           |        |     |      | 2 |
| E11 | 66 | Invasive ductal carcinoma | T2N0M0 | 2   | IIA  | 3 |
| E12 |    |                           |        |     |      | 3 |
| E13 |    |                           |        |     |      | 2 |
| E14 | 49 | Invasive ductal carcinoma | T4N0M0 | 2   | IIIB | 1 |
| E15 |    |                           |        |     |      | 2 |
| F1  |    |                           |        |     |      | 1 |
| F2  | 49 | Invasive ductal carcinoma | T2N0M0 | 2   | IIA  | 1 |
| F3  |    |                           |        |     |      | 0 |
| F4  |    |                           |        |     |      | 2 |
| F5  | 48 | Invasive ductal carcinoma | T2N2M0 | 3   | IIIA | 1 |
| F6  |    |                           |        |     |      | 2 |
| F7  |    |                           |        |     |      | 2 |
| F8  | 37 | Invasive ductal carcinoma | T3N0M0 | 3   | IIB  | 3 |
| F9  |    |                           |        |     |      | 2 |
| F10 |    |                           |        |     |      | 1 |
| F11 | 48 | Invasive ductal carcinoma | T3N0M0 | 3   | IIB  | 2 |
| F12 |    |                           |        |     |      | 1 |
| F13 |    |                           |        |     |      | 2 |
| F14 | 42 | Invasive ductal carcinoma | T2N0M0 | 2   | IIA  | 3 |
| F15 |    |                           |        |     |      | 2 |
| G1  |    |                           |        |     |      | 2 |
| G2  | 42 | Invasive ductal carcinoma | T4N2M0 | 1   | IIIB | 1 |
| G3  |    |                           |        |     |      | 1 |
| G4  |    |                           |        |     |      | 2 |
| G5  |    |                           |        |     |      | 1 |
| G6  | 50 | Invasive ductal carcinoma | T2N2M0 | 2   | IIIA | 3 |
| G7  |    |                           |        |     |      | 2 |
| G8  |    |                           |        |     |      | 2 |
| G9  | 63 | Invasive ductal carcinoma | T2N0M0 | 3   | IIA  | 2 |
| G10 |    |                           |        |     |      | 2 |
| G11 |    |                           |        |     |      | 3 |
| G12 | 34 | Invasive ductal carcinoma | T2N0M0 | 2   | IIA  | 3 |
| G13 |    |                           |        |     |      | 2 |
| G14 |    |                           |        |     |      | 3 |
| G15 | 50 | Invasive ductal carcinoma | T2N0M0 | 3   | IIA  | 3 |
| H1  |    |                           |        |     |      | 3 |
| H2  |    |                           |        |     |      | 2 |
| H3  | 39 | Invasive ductal carcinoma | T2N1M0 | 2   | IIB  | 2 |
| H4  |    |                           |        |     |      | 1 |
| H5  |    |                           |        |     |      | 2 |
| H6  | 54 | Invasive ductal carcinoma | T4N0M0 | 3   | IIIB | 0 |
| H7  |    |                           |        |     |      | 0 |
| H8  |    |                           |        |     |      | 0 |
| H9  | 49 | Invasive ductal carcinoma | T2N0M0 | 2   | IIA  | 2 |
| H10 |    |                           |        |     |      | 2 |
| H11 |    |                           |        |     |      | 3 |
|     | 55 | Invasive ductal carcinoma | T4N2M0 | 2   | IIIB | 0 |
|     |    |                           |        |     |      | 0 |
|     |    |                           |        |     |      | 0 |

|     |    |                                           |        |     |      |   |
|-----|----|-------------------------------------------|--------|-----|------|---|
| H12 |    |                                           |        |     |      | 0 |
| H13 |    |                                           |        |     |      | 1 |
| H14 | 32 | Invasive ductal carcinoma                 | T3N1M0 | 2   | IIIA | 1 |
| H15 |    |                                           |        |     |      | 1 |
| I1  |    |                                           |        |     |      | 0 |
| I2  | 53 | Invasive ductal carcinoma                 | T4N1M0 | 2-3 | IIIB | 0 |
| I3  |    |                                           |        |     |      | 0 |
| I4  |    |                                           |        |     |      | 1 |
| I5  | 44 | Invasive ductal carcinoma                 | T2N0M0 | 3   | IIA  | 1 |
| I6  |    |                                           |        |     |      | 1 |
| I7  |    |                                           |        |     |      | 1 |
| I8  | 70 | Invasive ductal carcinoma                 | T4N2M0 | 2   | IIIB | 1 |
| I9  |    |                                           |        |     |      | 1 |
| I10 |    |                                           |        |     |      | 1 |
| I11 | 48 | Invasive ductal carcinoma                 | T2N1M0 | 2   | IIB  | 1 |
| I12 |    |                                           |        |     |      | 1 |
| I13 |    |                                           |        |     |      | 2 |
| I14 | 68 | Invasive ductal carcinoma                 | T2N1M0 | 2   | IIB  | 2 |
| I15 |    |                                           |        |     |      | 2 |
| J1  |    |                                           |        |     |      | 0 |
| J2  | 28 | Invasive cribriform carcinoma             | T3N0M0 | 2   | IIB  | 1 |
| J3  |    |                                           |        |     |      | 1 |
| J4  |    |                                           |        |     |      | 0 |
| J5  | 48 | Squamous cell carcinoma                   | T4N0M0 | 2   | IIIB | 0 |
| J6  |    |                                           |        |     |      | 0 |
| J7  |    |                                           |        |     |      | 1 |
| J8  | 42 | Mixed invasive lobular and duct carcinoma | T2N1M0 | -   | IIB  | 1 |
| J9  |    |                                           |        |     |      | 1 |
| J10 |    |                                           |        |     |      | 1 |
| J11 | 48 | Medullary carcinoma                       | T3N0M0 | -   | IIB  | 1 |
| J12 |    |                                           |        |     |      | 1 |
| J13 |    |                                           |        |     |      | 3 |
| J14 | 41 | Medullary carcinoma                       | T2N1M0 | -   | IIB  | 3 |
| J15 |    |                                           |        |     |      | 3 |

n.d. not determined

| Scoring            | 0    | 1      | 2      | 3      | 4      | 5       |
|--------------------|------|--------|--------|--------|--------|---------|
| % of stained cells | <10% | 10~20% | 20~40% | 40~60% | 60~80% | 80~100% |
